# Supplementary material
Source: PubMed Central journal article supplement (PMC6800792)
Supplement: NIHMS1044623-supplement-Supplemental_Material.pdf [file NIHMS1044623-supplement-Supplemental_Material.pdf]

Supplementary Table 1.

Fit Indices for one to five group latent profile model

|          | BIC      | adjusted BIC | BLRT                | loglikelihood | entropy |
|----------|----------|--------------|---------------------|---------------|---------|
| # Groups |          |              | Primary Caregiver   |               |         |
| 1        | 23719.85 | 23719.85     |                     | -11822.02     |         |
| 2        | 22541.00 | 22480.67     | 1223.07, p<0.001    | -11210.49     | 0.90    |
| 3        | 22194.16 | 22111.62     | 391.07, p<0.001     | -11014.96     | 0.92    |
| 4        | 21981.05 | 21876.30     | 257.32, p<0.001     | -10886.30     | 0.93    |
| 5        | 21842.40 | 21715.42     | 182.87, p<0.001     | -10794.86     | 0.93    |
|          |          |              | Alternate Caregiver |               |         |
| 1        | 12619.88 | 12581.82     |                     | -6275.58      |         |
| 2        | 12059.32 | 11999.06     | 600.65, p<0.001     | -5975.25      | 0.96    |
| 3        | 11837.14 | 11754.68     | 262.26, p<0.001     | -5844.12      | 0.94    |
| 4        | 11683.48 | 11578.82     | 193.75, p<0.001     | -5747.25      | 0.94    |
| 5        | 11593.03 | 11593.03     | 130.54, p<0.001     | -5681.98      | 0.95    |
|          |          |              | Teacher             |               |         |
| 1        | 19976.57 | 19938.48     |                     | -9950.99      |         |
| 2        | 19231.48 | 19171.17     | 788.60, p<0.001     | -9556.70      | 0.88    |
| 3        | 18970.58 | 18888.05     | 304.40, p<0.001     | -9404.50      | 0.92    |
| 4        | 18822.20 | 18717.46     | 191.88, p<0.001     | -9308.56      | 0.90    |
| 5        | 18709.01 | 18582.04     | 156.70, p<0.001     | -9230.21      | 0.92    |

Supplementary Table 2.

Mean subscale T-scores for each group and by reporter

|                      | Anxious/<br>Depressed | Depressed/<br>Withdrawn | Somatic<br>Complaints | Rule-<br>breaking | Aggression | Attentional<br>Problems |
|----------------------|-----------------------|-------------------------|-----------------------|-------------------|------------|-------------------------|
| Groups               | Primary Caregiver     |                         |                       |                   |            |                         |
| Low Problems         | 52.06                 | 53.78                   | 53.41                 | 52.44             | 52.43      | 54.15                   |
| Internalizing 'only' | 67.09                 | 67.65                   | 64.68                 | 57.60             | 60.69      | 63.75                   |
| Externalizing 'only' | 56.01                 | 59.56                   | 56.95                 | 64.40             | 68.28      | 64.93                   |
| Co-occurring         | 73.12                 | 74.47                   | 68.06                 | 70.51             | 80.59      | 77.79                   |
|                      | Alternate Caregiver   |                         |                       |                   |            |                         |
| Low Problems         | 51.77                 | 53.68                   | 53.27                 | 52.06             | 52.61      | 53.37                   |
| Internalizing 'only' | 64.63                 | 64.24                   | 62.90                 | 53.84             | 58.26      | 58.34                   |
| Externalizing 'only' | 54.47                 | 58.15                   | 54.12                 | 64.05             | 65.43      | 62.35                   |
| Co-occurring         | 72.91                 | 74.61                   | 71.62                 | 67.52             | 76.43      | 77.57                   |
|                      | Teacher               |                         |                       |                   |            |                         |
| Low Problems         | 52.66                 | 54.09                   | 51.68                 | 52.47             | 52.22      | 51.51                   |
| Internalizing 'only' | 60.63                 | 67.75                   | 60.92                 | 57.08             | 56.71      | 58.01                   |
| Externalizing 'only' | 55.93                 | 56.02                   | 54.53                 | 64.46             | 64.36      | 56.24                   |
| Co-occurring         | 67.14                 | 67.40                   | 34.79                 | 73.99             | 79.38      | 60.12                   |

Supplementary Table 3.

Path coefficients for effects on adolescents' problem behavior

|            | Primary Caregiver ( <i>n</i> = 679) |              |              | Alternate Caregiver ( <i>n</i> = 670) |              |              | Teacher ( <i>n</i> = 677) |              |               |
|------------|-------------------------------------|--------------|--------------|---------------------------------------|--------------|--------------|---------------------------|--------------|---------------|
|            | CO vs. Low                          | CO vs. INT   | CO vs. EXT   | CO vs. Low                            | CO vs. INT   | CO vs. EXT   | CO vs. Low                | CO vs. INT   | CO vs. EXT    |
| FCU        | 0.13(0.13)                          | 0.13(0.18)   | 0.05(0.20)   | 0.22(0.25)                            | 0.40(0.29)   | 0.24(0.25)   | -0.01(0.20)               | -0.13(0.22)  | 0.05(0.25)    |
| Mom Dep 3  | -0.21(0.15)                         | -0.36(0.20)† | -0.51(0.21)* | -0.50(0.29)†                          | -0.41(0.37)  | -0.69(0.24)* | 0.23(0.23)                | 0.29(0.26)   | 0.09(0.23)    |
| Mom Dep 7  | -0.32(0.15)*                        | -0.07(0.22)  | -0.06(0.22)  | -0.04(0.31)                           | -0.25(0.41)  | 0.22(0.34)   | -0.52(0.18)*              | -0.34(0.21)  | -0.24(0.24)   |
| PBS 3      | 0.01(0.15)                          | 0.21(0.20)   | 0.02(0.22)   | 0.12(0.31)                            | 0.19(0.39)   | 0.03(0.33)   | 0.71(0.18)**              | 0.79(0.20)** | 0.89(0.17)**  |
| PBS 7      | 0.17(0.16)                          | 0.37(0.20)†  | 0.03(0.23)   | 0.52(0.31)†                           | 0.49(0.37)   | 0.25(0.42)   | -0.01(0.27)               | -0.06(0.30)  | -0.35(0.31)   |
| Gender     | -0.07(0.14)                         | 0.07(0.19)   | -0.22(0.21)  | -0.02(0.25)                           | 0.22(0.30)   | -0.04(0.28)  | -0.03(0.18)               | 0.12(0.21)   | 0.09(0.23)    |
| Race       | -0.15(0.13)                         | -0.02(0.18)  | -0.24(0.19)  | -0.39(0.24)                           | -0.33(0.31)  | -0.55(0.28)* | 0.29(0.19)                | 0.34(0.22)   | -0.20(0.29)   |
| Income     | 0.20(0.15)                          | 0.25(0.21)   | 0.09(0.23)   | 0.01(0.26)                            | -0.17(0.35)  | -0.18(0.29)  | -0.07(0.18)               | -0.01(0.21)  | -0.14(0.21)   |
| Urbanicity | -0.17(0.14)                         | -0.26(0.19)  | -0.31(0.20)  | 0.34(0.25)                            | 0.09(0.30)   | 0.14(0.28)   | 0.05(0.17)                | 0.33(0.20)†  | 0.26(0.22)    |
| PC INT     | -0.44(0.17)*                        | -0.21(0.25)  | -0.63(0.22)* | -0.44(0.36)                           | -0.03(0.47)  | -0.26(0.40)  | 0.45(0.21)*               | 0.35(0.26)   | 0.46(0.27)†   |
| PC EXT     | -0.36(0.13)*                        | -0.28(0.19)  | 0.05(0.21)   | 0.22(0.31)                            | 0.19(0.37)   | 0.53(0.27)*  | -0.49(0.19)*              | -0.39(0.23)† | -0.48(0.27)†  |
|            | --                                  | Low vs. INT  | Low vs. EXT  | --                                    | Low vs. INT  | Low vs. EXT  | --                        | Low vs. INT  | Low vs. EXT   |
| FCU        | --                                  | -0.05(0.14)  | -0.18(0.16)  | --                                    | 0.22(0.26)   | 0.02(0.21)   | --                        | -0.26(0.27)  | 0.08(0.16)    |
| Mom Dep 3  | --                                  | -0.13(0.18)  | -0.31(0.18)† | --                                    | 0.23(0.31)   | -0.25(0.27)  | --                        | 0.15(0.20)   | -0.03(0.20)   |
| Mom Dep 7  |                                     | 0.51(0.15)*  | 0.53(0.15)** |                                       | -0.30(0.40)  | 0.37(0.24)   |                           | 0.41(0.32)   | 0.47(0.18)*   |
| PBS 3      | --                                  | 0.30(0.16)†  | 0.02(0.19)   | --                                    | 0.08(0.30)   | -0.13(0.22)  | --                        | 0.16(0.36)   | 0.03(0.18)    |
| PBS 7      |                                     | 0.22(0.16)   | -0.29(0.18)† |                                       | -0.15(0.32)  | -0.40(0.24)† |                           | -0.12(0.35)  | -0.42(0.17)*  |
| Gender     | --                                  | 0.24(0.14)†  | -0.17(0.16)  | --                                    | 0.36(0.27)   | -0.04(0.20)  | --                        | 0.34(0.29)   | 0.14(0.16)    |
| Race       | --                                  | 0.26(0.14)†  | -0.04(0.17)  | --                                    | 0.18(0.27)   | -0.21(0.19)  | --                        | 0.09(0.31)   | -0.67(0.12)** |
| Income     | --                                  | -0.02(0.14)  | -0.26(0.17)  | --                                    | -0.26(0.32)  | -0.26(0.20)  | --                        | 0.14(0.32)   | -0.08(0.16)   |
| Urbanicity | --                                  | -0.06(0.15)  | -0.11(0.16)  | --                                    | -0.45(0.24)† | -0.31(0.19)  | --                        | 0.64(0.21)** | 0.24(0.15)    |
| PC INT     | --                                  | 0.55(0.15)** | -0.05(0.19)  | --                                    | 0.70(0.26)*  | 0.28(0.25)   | --                        | -0.24(0.38)  | -0.11(0.19)   |
| PC EXT     | --                                  | 0.27(0.16)†  | 0.75(0.15)** | --                                    | -0.10(0.28)  | 0.44(0.23)†  | --                        | 0.23(0.33)   | 0.13(0.19)    |

Notes. \*\* $p < 0.001$ , \* $p < 0.05$ , † $p < 0.10$ . Standardized coefficients and standard errors shown. Mom Dep: Maternal depression. PBS: Positive Behavior Support. CO: Co-occurring. INT: Internalizing only. Ext: Externalizing only. Low: Low Problems. PC: Primary Caregiver. FCU (Family Check-Up): 0=Control, 1=Intervention. Gender: 0=male, 1=female. Race: 1=Caucasian, 0=Other. Urbanicity: 1=rural, 2=suburban, 3=urban. Higher scores refer to higher levels of continuous variables.

Supplementary Table 4.

Path coefficients for effects on age 7 mediators

|            | Mom Dep 7    | PBS 7        |
|------------|--------------|--------------|
| FCU        | 0.03(0.04)   | -0.06(0.05)  |
| Gender     | 0.07(0.04)†  | 0.01(0.05)   |
| Race       | 0.06(0.04)   | -0.01(0.05)  |
| Income     | -0.02(0.04)  | 0.07(0.04)   |
| Urbanicity | 0.05(0.04)   | -0.05(0.05)  |
| Mom Dep 3  | 0.48(0.04)** | --           |
| PBS 3      | --           | 0.31(0.05)** |

Notes. \*\* $p < 0.001$ , \* $p < 0.05$ , † $p < 0.10$ . Standardized coefficients and standard errors shown. Mom Dep: Maternal depression. PBS: Positive Behavior Support. Results presented for PC model ( $n = 679$ ), as results from AC and teacher models were virtually identical. FCU (Family Check-Up): 0=Control, 1=Intervention. Gender: 0=male, 1=female. Race: 1=Caucasian, 0=Other. Urbanicity: 1=rural, 2=suburban, 3=urban. Higher scores refer to higher levels of continuous variables.

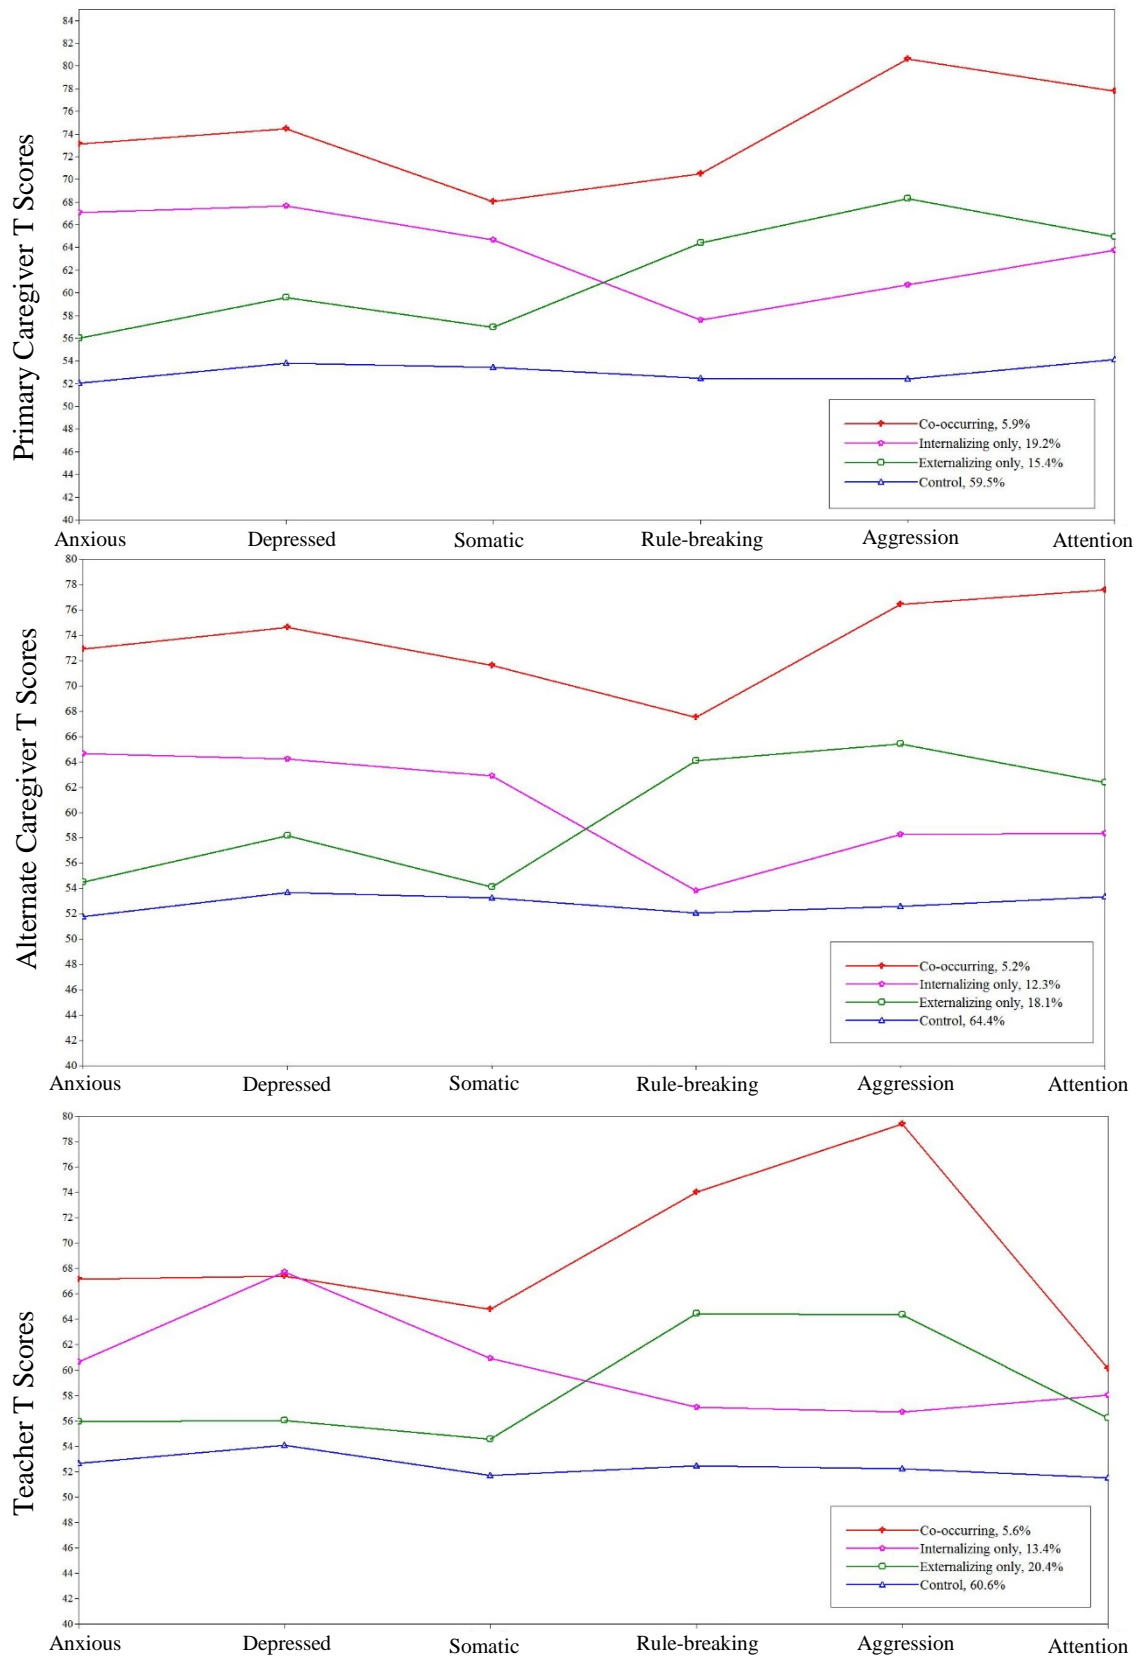

Supplementary Figure 1. Latent profiles by reporter. Primary caregiver latent profile:  $n = 554$ .

Alternate caregiver latent profile:  $n = 307$ . Teacher latent profile:  $n = 500$ .
